# Supplementary material for: Role of Fe, Transferrin and Transferrin Receptor in Anti-Tumor Effect of Vitamin C
Source: MDPI journal article supplement (doi:10.3390/cancers14184507), 2022-09-17
Supplement: s1 [file s1]

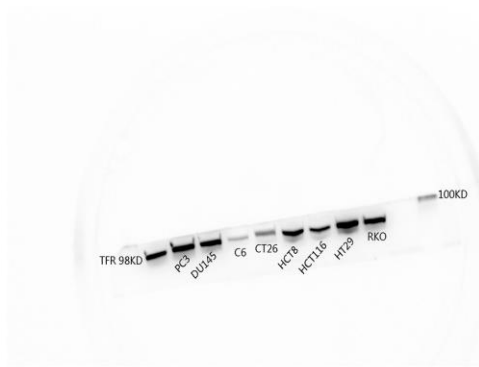

figure 5A

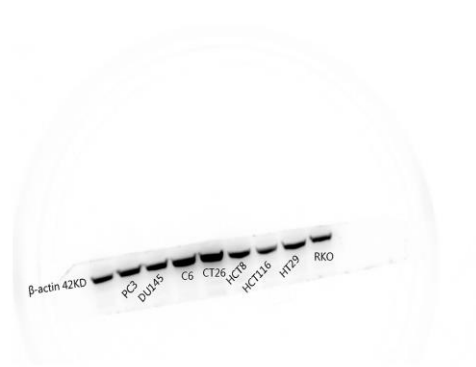

figure 5A

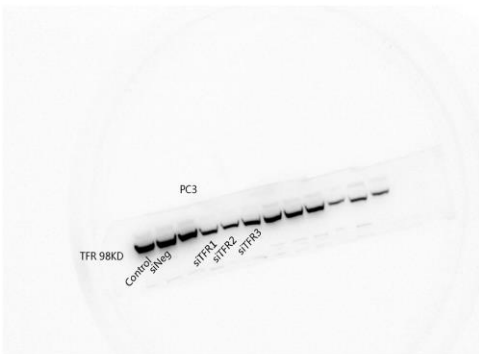

figure 5C

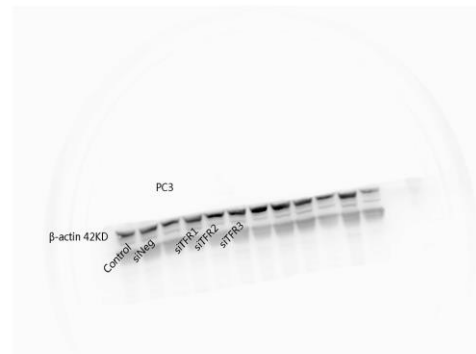

figure 5C

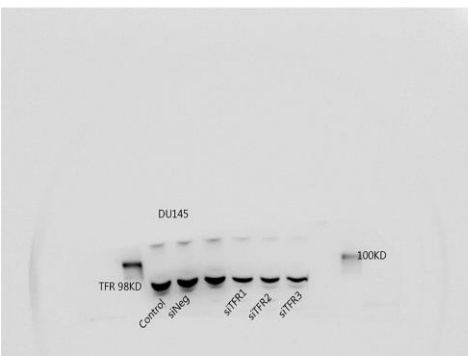

figure 5E

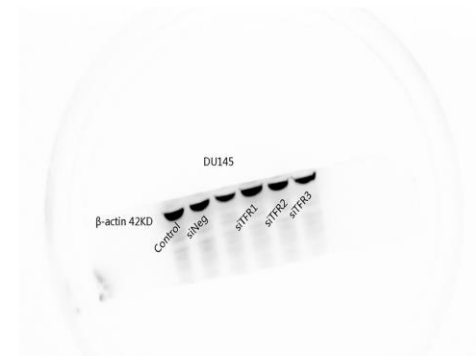

figure 5E

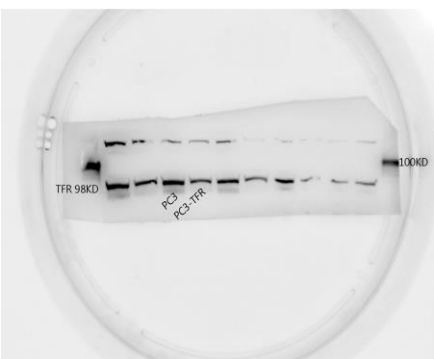

figure 6C

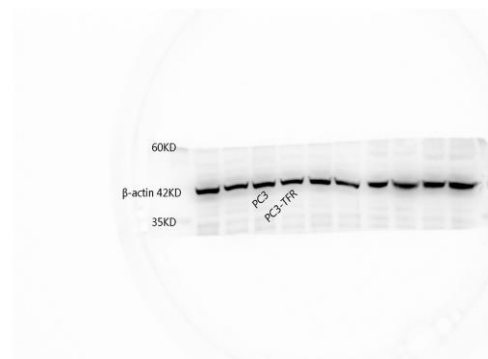

figure 6C

**Figure S1.** The western blot original figures (uncropped blots).

|                |         |           |         |         |         |        |        |        |
|----------------|---------|-----------|---------|---------|---------|--------|--------|--------|
| Figure 5A      |         |           |         |         |         |        |        |        |
|                | PC3     | C6        | CT26    | DU145   | HCT8    | HCT116 | HT29   | RKO    |
| TFR            | 245351  | 23867     | 56666   | 202889  | 173732  | 98795  | 251467 | 193141 |
| $\beta$ -actin | 205132  | 316581    | 369465  | 209597  | 179288  | 132384 | 192658 | 134265 |
|                |         |           |         |         |         |        |        |        |
| Figure 5C      |         |           |         |         |         |        |        |        |
| PC3            | Control | siNeg     | siTFR-1 | siTFR-2 | siTFR-3 |        |        |        |
| TFR            | 288939  | 271746    | 103238  | 84197   | 138672  |        |        |        |
| $\beta$ -actin | 75882   | 72744     | 79378   | 80023   | 91565   |        |        |        |
|                |         |           |         |         |         |        |        |        |
| Figure 5E      |         |           |         |         |         |        |        |        |
| DU145          | Control | siNeg     | siTFR-1 | siTFR-2 | siTFR-3 |        |        |        |
| TFR            | 299637  | 296788    | 146319  | 143416  | 120215  |        |        |        |
| $\beta$ -actin | 318279  | 293911    | 311022  | 277413  | 224228  |        |        |        |
|                |         |           |         |         |         |        |        |        |
| Figure 6C      |         |           |         |         |         |        |        |        |
|                | PC3     | PC3-siTFR |         |         |         |        |        |        |
| TFR            | 208819  | 80934     |         |         |         |        |        |        |
| $\beta$ -actin | 194932  | 157595    |         |         |         |        |        |        |

**Table S1.** The IntDen of western blot bands.
